# Supplementary material
Source: PubMed Central journal article supplement (PMC2434205)
Supplement: neo1007_0680SD1.pdf [file neo1007_0680SD1.pdf]

**Table W1.** Primer Sequences and dHPLC Conditions.

| Exon      | Primer FW                            | Primer RV                          | $T_m$ PCR (°C) | Ampl. Size (bp) | tdHPLC     | % B        |
|-----------|--------------------------------------|------------------------------------|----------------|-----------------|------------|------------|
| 1         | 5'-CTCCACAGACCCTCTCCTTG-3'           | 5'-GGACAGAGTAGGTGAGGGGA-3'         | 58             | 242             | 64–68      | 57–54      |
| 2         | 5'-AAACGTCATGATTTTCAATGGC-3'         | 5'-GGGGAATTTGCTTTCTTTTCTT-3'       | 58             | 281             | 55.5       | 56.6       |
| 3         | 5'-TTTCACTTTTCAGATGTGTGTG-3'         | 5'-CTTTGTGAATTTGATCTTGAG-3'        | 58             | 210             | 55.5       | 54.8       |
| 4a        | 5'-GTTTGAATAATTTTCATAATAGAAA-3'      | 5'-CTCACAGCAGCTTTGACCTCC-3'        | 58             | 417             | 51–57      | 61–57      |
| 4b        | 5'-CAAGTGGTCTCCTCCCTT-3'             | 5'-GTCAAAAAGTAGTATCATGAATG-3'      | 58             | 283             | 55         | 55         |
| 4c        | 5'-TTTCTAGCAGACAACATCGA-3'           | 5'-ATTTGTGTTGTGTAGCATCCT-3'        | 62             | 308             | 54.5       | 57.5       |
| 5         | 5'-GAAGGAAGTTAGAAAGTTGTGACA-3'       | 5'-ATGGCTGGTAAGGATACGATTG-3'       | 62             | 172             | 54         | 51         |
| 6         | 5'-CATGTTTATCTTTTAAAAGTTTG-3'        | 5'-ATGTGAAGCAGTTTTATTTTACTCAA-3'   | 62             | 332             | 54.5–56    | 58.6–56.6  |
| 7         | 5'-ATTTGCTATAATATAGTACATCTGG-3'      | 5'-GTTGATAAGTTTCATAGAGCTGCTTT-3'   | 62             | 385             | 53–56.5    | 58–54.3    |
| 8         | 5'-GGATTTTACTGCATTTGTGTG-3'          | 5'-TATCTAACTATATTTACTGATGCTGTTA-3' | 58             | 276             | 56         | 56         |
| 9         | 5'-GCTGTCTTTTGGCTTC-3'               | 5'-CCAAAAGGTATGCTAAATAC-3'         | 58             | 183             | 54.5–56    | 52.2–49.7  |
| 9br       | 5'-GCTTAAAATTTGTATACATAA-3'          | 5'-CCTGGAGTGGTGCTTCATGCAT-3'       | 58             | 193             | 55–60      | 52–48      |
| 10a       | 5'-CTACAGTGATAAACAAGACAT-3'          | 5'-ATTCCTGCTGCTTTGGTT-3'           | 62             | 292             | 55–58      | 58–55      |
| 10a2      | 5'-CATTTTTTGGTGTTTATGATAGCAAG-3'     | 5'-GTGTATAGTTACCATTATAGTCACATC-3'  | 62             | 252             | 54–57–60.5 | 57–54–50   |
| 10b       | 5'-ATTATCCTGAGTCTTATGTC-3'           | 5'-TCTCAAAATATCACACTAAGTTA-3'      | 58             | 229             | 54–57      | 56.2–51.2  |
| 10c       | 5'-ACCTTTAGCAGTCACTGTC-3'            | 5'-CTGTGAGTAACAGGTAGATG-3'         | 58             | 307             | 54–59      | 59–54.4    |
| 11        | 5'-GAAAGAGCTCAATTTCTAGC-3'           | 5'-CACTTCAAAGGTTTATGGT-3'          | 58             | 307             | 52–55      | 58–55      |
| 12a       | 5'-TGTAATCAATATGGGAGAATGCC-3'        | 5'-TGGAAGAATATTTGGAATGGTAAT-3'     | 58             | 269             | 54–56      | 56–54      |
| 12b       | 5'-GAGGTTTTTAGGAGAGTCTC-3'           | 5'-ATGTGCTCTGTTGTTTCTG-3'          | 58             | 315             | 54–57.5    | 58–53.4    |
| 13        | 5'-CACAGTTTATGCACTTGTAG-3'           | 5'-CTGCCTCAAAGCACATGCC-3'          | 62             | 380             | 57–61      | 59–54      |
| 14        | 5'-GCTCTTCCCTACTCTTTTGG-3'           | 5'-TATGCCCTTAGCAACAAA-3'           | 58             | 191             | 60         | 54         |
| 15        | 5'-ACTTGGCTGTAGCTGATTGA-3'           | 5'-TCAAGAGTCCGCTCAGTAAAGT-3'       | 62             | 247             | 57         | 57         |
| 16        | 5'-CATTTTTTGTACTTTTGTGATGG-3'        | 5'-CTCTATTTTTTACCTTTCTC-3'         | 58             | 579             | 55–58      | 63–60      |
| 17        | 5'-ATTTGGCTCTATGCCTGTGG-3'           | 5'-ACTGCACACAACTAGGGTG-3'          | 58             | 385             | 55.5       | 58.8       |
| 18        | 5'-AGAAAGTTGTGTAGCTCTTTTCT-3'        | 5'-GCGGTTATTTGGTGAAGAGG-3'         | 58             | 367             | 53–56      | 57–54.4    |
| 19a       | 5'-TCATGTCACTTAGGTTATCTGG-3'         | 5'-CCTTCAAGTATTAGTGGGTTTTA-3'      | 58             | 242             | 55–57.5    | 58–55.7    |
| 19b       | 5'-TGAGGGGAAGTGAAGAAGT-3'            | 5'-GCAAAAAGCAAATAAAGCC-3'          | 58             | 236             | 53.5–57.5  | 56.5–52.5  |
| 20        | 5'-CCACCCTGGCTGATTTATCG-3'           | 5'-GCATGTAAGAGAAGCAAAAATTA-3'      | 62             | 402             | 57–59      | 59–57      |
| 21        | 5'-AGCAAAAATTAAGTCCAGCAA-3'          | 5'-TCAGAGCCAGAGAAGATG-3'           | 58             | 393             | 57–59      | 59–57      |
| 22        | 5'-TGCTACTCTTTAGCTTCTAC-3'           | 5'-GGCTGATTGTCTTCTTTAAGG-3'        | 58             | 331             | 56.5–58    | 58.6–57    |
| 23.1      | 5'-TTTGTATCACTTATTTGTGTGA-3'         | 5'-CTTTTACATAGAACCCGCTGTTTTT-3'    | 58             | 283             | 56–57      | 58.2–57.2  |
| 23.2      | 5'-GGCTTAAATGCTGTATA-3'              | 5'-GAGATTACCATTATTAATCTAAAGT-3'    | 58             | 270             | 53–59      | 57–51.3    |
| 23a       | 5'-AGCCAGAATATGAGACATGATGGG-3'       | 5'-TCTACTAATTTCTGGCACAATAAG-3'     | 62             | 446             | 54.5       | 60.3       |
| 24        | 5'-TTGAAGTCTTTGTTCATGCTTT-3'         | 5'-GATAATCTAGCTATCTTAAATTCC-3'     | 58             | 266             | 53–58      | 57–52.1    |
| 25        | 5'-AATTTATAGATGAGGAATG-3'            | 5'-GTACTCTTTTACATGAAGTTCCT-3'      | 54             | 335             | 52–54–57   | 58–56–53.7 |
| 26        | 5'-GCTTTGCTAATGTCAAGTCA-3'           | 5'-GATAGTGAACACTCTCCGTTTAA-3'      | 62             | 342             | 56–58      | 58–54      |
| 27a       | 5'-ATGGTCTGTAGGTTTGTG-3'             | 5'-GCCACCAGGCCACTGTGTAG-3'         | 62             | 361             | 57         | 59         |
| 27b       | 5'-TTGCTTTTAAAATATTTTTTCATTTTAG-3'   | 5'-CCCAGTTGACTTAACAGGAATT-3'       | 58             | 330             | 55         | 55         |
| 28        | 5'-AAAATAAAATTTGATTTAGTGGCATCTG-3'   | 5'-AAATGTCACGTAAAGGCTGTGCG-3'      | 62             | 636             | 55–58      | 62–60      |
| 29        | 5'-TCTGGAGCCTTTTAGAATTTTATGT-3'      | 5'-TCAGTTTGTATTTGGGGTTTGTTC-3'     | 62             | 460             | 58–60.5    | 60–55.5    |
| 30        | 5'-GAAAAAATTTTGGAACTATAAGG-3'        | 5'-TAACAATTAATCTAAGACAATAAG-3'     | 58             | 322             | 51–56.5    | 58–54      |
| 31        | 5'-TTTTTCCCGAATTTCTTTATG-3'          | 5'-CTTCAGAAAGCATGTAGACTCAC-3'      | 58             | 425             | 55–57      | 61–59      |
| 32        | 5'-ATCTAGTATTTTGTAGGCCTCAG-3'        | 5'-CCTTCTGTACTATAGCATATCTG-3'      | 58             | 312             | 53–56      | 58–55      |
| 33        | 5'-TGCTAAAACCTTTGAGTCCCATG-3'        | 5'-GTGCTCTAACCCAAGTTGC-3'          | 64             | 448             | 56–59      | 59–53.8    |
| 34        | 5'-TTCTAAAATTCAAAATGAAAATGG-3'       | 5'-AAAAACACTTGCAGTGTAG-3'          | 58             | 432             | 51.5–57    | 60–55      |
| 35        | 5'-GCATGGACTGTGTATTGGTA-3'           | 5'-TCTGTGGATCTTTAATTGCA-3'         | 58             | 319             | 53.5       | 56.8       |
| 36        | 5'-GCTGGACCAGTGGACAGAAC-3'           | 5'-GACGTTTAAATTTGAGGTCAATGA-3'     | 62             | 389             | 53–58      | 57.8–54.3  |
| 37        | 5'-TCCTGAATTCATCCGAGATT-3'           | 5'-TCATTTTGGGTATCAGTGTGAA-3'       | 58             | 237             | 54–56      | 55.5–53.5  |
| 38        | 5'-AACTGCAATGTGTTTGAAGAG-3'          | 5'-GAGGTTCCAGATTACTCAAATTTAG-3'    | 62             | 257             | 57–60      | 56–53      |
| 39        | 5'-TTGAACACAAAATTAAGTGAAGCC-3'       | 5'-GAAGTAAAGTTAGCCCTTATGTCTTAC-3'  | 62             | 318             | 56         | 55         |
| 40        | 5'-ATTCACATTCACATATGCATGTTTACCTTC-3' | 5'-CTTTGGTTCAAGACACTACAG-3'        | 62             | 547             | 55–56      | 61.6–61.1  |
| 41        | 5'-GTGCACATTAACAGTACTAT-3'           | 5'-ATCTAGAGATGGCCTAGGAAG-3'        | 62             | 373             | 55.5       | 58         |
| 42        | 5'-CTTGGAAAGGCAAACGATGGTTG-3'        | 5'-CCATGTCAGTGAAGCAAGTTTGTG-3'     | 58             | 356             | 55–60      | 56–52.2    |
| 43        | 5'-AGTGTATTTCCCATTTATAGACTG-3'       | 5'-CATTTAAAATAAGGTGGGAGA-3'        | 58             | 234             | 55–57.5    | 56–52.4    |
| 44        | 5'-GAAGTAACATTGAAATAGTTAGG-3'        | 5'-TCCAGTCTACTTTTAGGAGGCC-3'       | 58             | 271             | 58.5       | 55         |
| 45        | 5'-CATGAATAGGATACAGTCTTCTAC-3'       | 5'-GTTAAATGCTTACCAGTAATGTG-3'      | 62             | 269             | 57         | 56         |
| 46        | 5'-CTCATCTCCCTTTAATTTTGGC-3'         | 5'-TCTGGAGAAGGATGGTTGATG-3'        | 58             | 295             | 54–56.5    | 57–55.1    |
| 47        | 5'-CTGTTACAATTTAAAGATACCTTG-3'       | 5'-GTATGCCCTGCTTTAAGAACACACA-3'    | 62             | 185             | 55.5       | 51.4       |
| 48        | 5'-AAGGAAGAAAAATAGTAAATTAAGTCC-3'    | 5'-GTTTATAGCAAATTTTGCTCCTT-3'      | 58             | 423             | 53–58      | 61–56.9    |
| 48a       | 5'-ATTCAATAATTTAAACCAGATCC-3'        | 5'-CTTTAGGAACCTTGTAAAGCCACC-3'     | 58             | 327             | 54         | 58         |
| 49        | 5'-AGAATGTGTCCCGTTGTGTTAA-3'         | 5'-TAATGAACCCATCCGGTTTGTG-3'       | 58             | 369             | 58.5       | 58.4       |
| KRAS ex2  | 5'-ACTGGTGGAGTATTTGATA-3'            | 5'-GTATCAAAGAATGGTCCCT-3'          | 50             | —               | —          | —          |
| KRAS ex3  | 5'-ATAATAGCCAATCCTAA-3'              | 5'-ATGGCATTAGCAAAG-3'              | 53             | —               | —          | —          |
| BRAF ex11 | 5'-TCATAATGCTTGTCTGATAGGA-3'         | 5'-GGCCAAAATTTAATCAGTGGGA-3'       | 60             | —               | —          | —          |
| BRAF ex15 | 5'-TCCCTCTCAGGCATAAGGTAA-3'          | 5'-CGAACAGTGAATATTTCTTTGTAT-3'     | 58             | —               | —          | —          |

$T_m$  PCR, indicates PCR melting temperature (°C); Ampl. Size, amplicon size; tdHPLC, range in temperature used with high-performance liquid chromatography; % B, starting concentration for buffer B used in dHPLC.

**Table W2.** Detailed Somatic Events of Four Components in the MAPK Pathway.

| Tumor ID | MSI Status | <i>KRAS</i> <sup>mut</sup> | <i>BRAF</i> <sup>mut</sup> | <i>NF1</i> <sup>mut</sup> | MLPA                | Real-time | <i>RASSF1A</i> |
|----------|------------|----------------------------|----------------------------|---------------------------|---------------------|-----------|----------------|
| 848      | MSI        | WT                         | WT                         | NP                        | NP                  |           | U              |
| 854      | MSI        | c.184-189delGAG            | WT                         | NP                        | NP                  |           | U              |
| 884      | MSI        | WT                         | V600E                      | D1302Y/V2577G             | WT                  |           | U              |
| 894      | MSI        | c.49insTTG                 | WT                         | NP                        | NP                  |           | U              |
| 910      | MSI        | WT                         | WT                         | c.(3114-50)delTG          | WT                  |           | U              |
| 912      | MSI        | G13D                       | WT                         | NP                        | NP                  |           | U              |
| 955      | MSI        | WT                         | V600E                      | NP                        | NP                  |           | U              |
| 965      | MSI        | WT                         | V600E                      | NP                        | NP                  |           | U              |
| 980      | MSI        | WT                         | V600E                      | WT                        | WT                  |           | U              |
| 984      | MSI        | WT                         | V600E                      | WT                        | WT                  |           | U              |
| 988      | MSI        | WT                         | WT                         | NP                        | NP                  |           | ND             |
| 1022     | MSI        | WT                         | WT                         | NP                        | NP                  |           | U              |
| 1044     | MSI        | WT                         | V600E                      | c.480-57C>T               | WT                  |           | U              |
| 1047     | MSI        | G12A/V14I                  | WT                         | WT                        | WT                  |           | M              |
| 1066     | MSI        | WT                         | WT                         | WT                        | WT                  |           | M              |
| 1117     | MSI        | WT                         | WT                         | NP                        | NP                  |           | U              |
| 1132     | MSI        | G12V                       | WT                         | NP                        | NP                  |           | U              |
| 1141     | MSI        | WT                         | WT                         | NP                        | NP                  |           | U              |
| 1190     | MSI        | WT                         | V600E                      | NP                        | NP                  |           | M              |
| 1193     | MSI        | WT                         | V600E                      | c.7395-7C>T               | WT                  |           | U              |
| 1268     | MSI        | WT                         | V600E                      | Ex3+24G>A                 | WT                  |           | U              |
| 1273     | MSI        | WT                         | V600E                      | c.(1392+46_+53)delTT      | WT                  |           | U              |
| 1314     | MSI        | WT                         | WT                         | NP                        | NP                  |           | U              |
| 1326     | MSI        | G13D                       | WT                         | c.(1392+46_+53)delT       | WT                  |           | U              |
| 1341     | MSI        | WT                         | V600E                      | c.(61-4_-12)delT          | WT                  |           | M              |
| 1349     | MSI        | WT                         | WT                         | NP                        | NP                  |           | M              |
| 1363     | MSI        | G13D                       | WT                         | WT                        | Gain of IVS27b-Ex49 | 1.66      | U              |
| 1388A    | MSI        | WT                         | WT                         | NP                        | NP                  |           | M              |
| 1388C    | MSI        | G13D                       | WT                         | NP                        | NP                  |           | M              |
| 868      | MSS        | WT                         | WT                         | NP                        | NP                  |           | U              |
| 886      | MSS        | G12D                       | WT                         | NP                        | NP                  |           | U              |
| 887      | MSS        | G12C                       | WT                         | NP                        | NP                  |           | M              |
| 896      | MSS        | WT                         | WT                         | WT                        | Gain of whole gene  | 1.59      | M              |
| 904      | MSS        | WT                         | WT                         | NP                        | NP                  |           | U              |
| 922      | MSS        | G12V                       | WT                         | NP                        | NP                  |           | U              |
| 923      | MSS        | G13D                       | WT                         | NP                        | NP                  |           | U              |
| 927      | MSS        | G12V                       | WT                         | NP                        | NP                  |           | M              |
| 946      | MSS        | WT                         | WT                         | NP                        | NP                  |           | U              |
| 948      | MSS        | G12R                       | WT                         | NP                        | NP                  |           | U              |
| 953      | MSS        | WT                         | WT                         | WT                        | WT                  |           | U              |
| 966      | MSS        | Q61L                       | WT                         | NP                        | NP                  |           | U              |
| 974      | MSS        | G12A                       | WT                         | NP                        | NP                  |           | U              |
| 976      | MSS        | G12D                       | WT                         | NP                        | NP                  |           | M              |
| 1013     | MSS        | WT                         | D594G                      | NP                        | NP                  |           | U              |
| 1024     | MSS        | G12C                       | WT                         | NP                        | NP                  |           | U              |
| 1027     | MSS        | G13D                       | WT                         | NP                        | NP                  |           | U              |
| 1029     | MSS        | G12D                       | WT                         | NP                        | NP                  |           | U              |
| 1046     | MSS        | WT                         | WT                         | NP                        | NP                  |           | U              |
| 1060     | MSS        | WT                         | WT                         | NP                        | NP                  |           | M              |
| 1069     | MSS        | WT                         | WT                         | NP                        | NP                  |           | U              |
| 1103     | MSS        | WT                         | WT                         | WT                        | Gain of whole gene  | 1.25      | U              |
| 1111     | MSS        | WT                         | WT                         | NP                        | NP                  |           | M              |
| 1121     | MSS        | G12A                       | WT                         | WT                        | WT                  |           | M              |
| 1124     | MSS        | G12D/G13D                  | WT                         | WT                        | WT                  |           | ND             |
| 1166     | MSS        | G13D                       | WT                         | WT                        | WT                  |           | M              |
| 1167     | MSS        | WT                         | WT                         | WT                        | Gain of whole gene  | 1.67      | M              |
| 1194     | MSS        | WT                         | WT                         | NP                        | NP                  |           | M              |
| 1197     | MSS        | WT                         | WT                         | NP                        | NP                  |           | ND             |
| 1287     | MSS        | WT                         | WT                         | c.2252-31A>G              | WT                  |           | ND             |
| 1294     | MSS        | WT                         | G469R                      | NP                        | NP                  |           | U              |
| 1296     | MSS        | G13D                       | WT                         | WT                        | WT                  |           | U              |
| 1340     | MSS        | WT                         | WT                         | WT                        | WT                  |           | ND             |
| 1364     | MSS        | WT                         | L597Q                      | NP                        | NP                  |           | M              |
| 1369     | MSS        | G12D                       | ND                         | NP                        | NP                  |           | ND             |
| 1391     | MSS        | G12D                       | WT                         | c.2252-31A>T              | WT                  |           | U              |
